# Supplementary material for: Breast or Bottle: A Content Analysis of Infant Feeding Recommendation Videos on YouTube, Bilibili, and TikTok
Source: Research Square preprint supplement (doi:10.21203/rs.3.rs-6321827/v1), 2025-05-07
Supplement: Supplementary file 1 [file 84300ba7d544be069f04ea04.xlsx]

## Sheet: Tik Tok
Supplementary table S1 The basic information and ratings of all videos
No.	Source	Type of certifed uploaders	Likes	Collections	Shared	Comments	Feeding recommendations	Video duration（s）	GQSscore	VIQIscore	VIQIscore1	VIQIscore2	VIQIscore3	VIQIscore4	mDISCERNscore	mDISCERN1	mDISCERN2	mDISCERN3	mDISCERN4	mDISCERN5
1	TikTok	Professional individuals	41056	1605	17657	5215	Breastfeeding	52	4	17	5	4	3	5	3	1	0	1	0	1
2	TikTok	Ofcial media	155	28	280	32	Mixed feeding	71	4	15	3	4	3	5	3	1	1	1	0	0
3	TikTok	Self-media	71420	1021	13039	14173	Formula feeding	62	3	15	5	3	2	5	1	1	0	0	0	0
4	TikTok	Professional individuals	11803	632	11412	3432	Breastfeeding	55	4	17	5	4	3	5	2	1	0	1	0	0
5	TikTok	Self-media	25909	458	2881	3752	Breastfeeding	155	3	16	5	3	3	5	2	1	0	1	0	0
6	TikTok	Professional individuals	1898	269	1414	917	Breastfeeding	20	4	15	3	4	3	5	2	1	0	0	0	1
7	TikTok	Self-media	3334	250	711	720	Breastfeeding	143	4	14	3	3	3	5	2	1	0	1	0	0
8	TikTok	Self-media	25	2	26	1	Breastfeeding	65	4	12	1	3	3	5	2	1	0	0	0	1
9	TikTok	Self-media	231	56	516	35	Breastfeeding	71	4	15	3	4	3	5	3	1	0	1	0	1
10	TikTok	Professional individuals	299	125	412	20	Breastfeeding	211	3	14	3	3	3	5	2	1	0	0	0	1
11	TikTok	Self-media	1155	119	279	111	Breastfeeding	25	2	12	4	2	3	3	1	1	0	0	0	0
12	TikTok	Self-media	2033	248	578	461	Mixed feeding	181	2	11	3	2	3	3	1	1	0	0	0	0
13	TikTok	Self-media	14694	453	661	631	Mixed feeding	64	3	15	5	3	3	4	1	1	0	0	0	0
14	TikTok	Self-media	6373	1708	9633	1504	Formula feeding	143	4	15	4	3	3	5	2	1	0	0	0	1
15	TikTok	Self-media	20147	934	2154	2371	Mixed feeding	92	3	16	5	3	3	5	1	1	0	0	0	0
16	TikTok	Self-media	147	26	65	149	Mixed feeding	141	3	13	3	3	3	4	1	1	0	0	0	0
17	TikTok	Self-media	144	134	54	3	Breastfeeding	155	4	15	3	4	3	5	2	1	0	0	0	1
18	TikTok	Ofcial media	25131	5028	44716	8754	Breastfeeding	40	3	17	5	4	3	5	1	1	0	0	0	0
19	TikTok	Self-media	55717	2440	7876	5095	Mixed feeding	110	3	16	5	3	3	5	1	1	0	0	0	0
20	TikTok	Self-media	6971	1781	1566	1738	Formula feeding	201	3	15	4	3	3	5	1	1	0	0	0	0
21	TikTok	Self-media	9781	2733	10236	5996	Breastfeeding	83	4	15	4	3	3	5	2	1	0	0	0	1
22	TikTok	Professional individuals	2151	712	3864	387	Breastfeeding	95	4	16	4	4	3	5	1	1	0	0	0	0
23	TikTok	Self-media	6635	1593	7256	2889	Formula feeding	409	3	15	4	3	3	5	1	1	0	0	0	0
24	TikTok	Self-media	17201	2603	4302	2730	Mixed feeding	99	3	16	5	3	3	5	1	1	0	0	0	0
25	TikTok	Self-media	174	29	158	151	Breastfeeding	135	3	14	3	3	3	5	1	1	0	0	0	0
26	TikTok	Self-media	20544	5731	33184	6175	Mixed feeding	77	3	16	5	3	3	5	1	1	0	0	0	0
27	TikTok	Self-media	47110	14703	59962	23569	Formula feeding	98	4	16	5	3	3	5	1	1	0	0	0	0
28	TikTok	Self-media	3721	485	739	872	Formula feeding	81	4	14	3	3	3	5	1	1	0	0	0	0
29	TikTok	Professional individuals	19587	5407	19059	5379	Mixed feeding	54	4	16	5	3	3	5	1	1	0	0	0	0
30	TikTok	Self-media	7378	817	4447	2420	Breastfeeding	185	4	15	4	3	3	5	1	1	0	0	0	0
31	TikTok	Self-media	11973	2751	18702	5257	Formula feeding	88	4	16	5	3	3	5	1	1	0	0	0	0
32	TikTok	Professional individuals	1480	109	238	1358	Breastfeeding	115	4	14	3	3	3	5	2	1	0	0	0	1
33	TikTok	Self-media	5080	975	6107	4844	Formula feeding	105	4	15	4	3	3	5	1	1	0	0	0	0
34	TikTok	Professional individuals	17057	4831	17860	3028	Breastfeeding	145	4	14	3	3	3	5	2	1	0	0	0	1
35	TikTok	Self-media	9912	1030	3949	7441	Formula feeding	188	4	15	4	3	3	5	1	1	0	0	0	0
36	TikTok	Self-media	110	33	142	48	Breastfeeding	219	4	13	2	3	3	5	2	1	0	0	0	1
37	TikTok	Self-media	36028	5308	90132	27882	Formula feeding	21	2	20	5	5	5	5	1	1	0	0	0	0
38	TikTok	Self-media	11345	3151	29222	4618	Breastfeeding	32	4	20	5	5	5	5	3	1	0	1	1	0
39	TikTok	Professional individuals	3031	772	4964	1789	Breastfeeding	221	4	16	4	4	3	5	3	1	1	1	0	0
40	TikTok	Professional individuals	12579	3098	4772	12730	Breastfeeding	103	4	20	5	5	5	5	4	1	1	1	1	0
41	TikTok	Self-media	10537	1573	7358	7338	Formula feeding	117	4	17	5	4	3	5	2	1	0	0	0	1
42	TikTok	Professional individuals	8610	1669	3001	137	Mixed feeding	73	4	16	5	5	3	3	3	1	0	1	1	0
43	TikTok	Self-media	8066	1735	10943	5171	Formula feeding	74	4	15	5	4	2	4	1	1	0	0	0	0
44	TikTok	Self-media	2800	910	4143	979	Mixed feeding	77	5	18	4	5	4	5	2	1	0	0	0	1
45	TikTok	Self-media	209	75	191	43	Mixed feeding	177	4	14	2	4	3	5	2	1	0	0	0	1
46	TikTok	Self-media	953	219	1777	1186	Formula feeding	69	4	13	3	3	2	5	2	1	0	0	0	1
47	TikTok	Self-media	399	124	455	184	Formula feeding	111	5	17	2	5	4	6	1	1	0	0	0	0
48	TikTok	Self-media	1286	413	2156	885	Mixed feeding	170	5	18	4	5	4	5	2	1	0	0	0	1
49	TikTok	Self-media	66	32	6	12	Formula feeding	122	3	12	1	3	2	6	2	1	0	0	0	1
50	TikTok	Self-media	560	19	52	5306	Mixed feeding	77	4	15	2	4	3	6	1	1	0	0	0	0
51	TikTok	Self-media	9624	645	5764	13460	Formula feeding	47	3	11	5	2	1	3	1	1	0	0	0	0
52	TikTok	Self-media	64402	12367	93095	14998	Formula feeding	88	5	17	5	5	3	4	2	1	0	0	0	1
53	TikTok	Self-media	2319	507	3433	3526	Formula feeding	49	4	14	4	4	2	4	1	1	0	0	0	0
54	TikTok	Self-media	3831	1259	11657	2237	Formula feeding	55	4	16	4	4	3	5	2	1	0	0	0	1
55	TikTok	Self-media	125	41	113	76	Breastfeeding	120	3	14	3	3	3	5	1	1	0	0	0	0
56	TikTok	Self-media	1943	498	1099	584	Formula feeding	24	4	14	3	3	3	5	1	1	0	0	0	0
57	TikTok	Professional individuals	149	29	73	49	Breastfeeding	30	3	13	2	3	3	5	1	1	0	0	0	0
58	TikTok	Self-media	3	0	0	0	Mixed feeding	52	4	15	3	4	3	5	3	1	1	1	0	0
59	TikTok	Self-media	3	1	1	0	Mixed feeding	72	4	15	3	4	3	5	3	1	1	1	0	0
60	TikTok	Self-media	869	116	161	733	Mixed feeding	47	3	12	2	3	2	5	1	1	0	0	0	0
61	TikTok	Self-media	901	172	1729	995	Formula feeding	34	3	13	2	3	3	5	1	1	0	0	0	0
62	TikTok	Self-media	7234	1079	46840	6701	Mixed feeding	85	3	16	4	4	3	5	2	1	0	1	0	0
63	TikTok	Self-media	26	1	8	44	Breastfeeding	19	2	10	1	3	2	4	1	1	0	0	0	0
64	TikTok	Self-media	15183	3190	17535	11743	Formula feeding	82	4	18	5	4	4	5	2	1	0	1	0	0
65	TikTok	Self-media	8282	378	4331	2214	Formula feeding	59	3	16	4	3	3	5	1	1	0	0	0	0
66	TikTok	Professional individuals	8947	2220	37207	4648	Breastfeeding	63	4	17	4	4	4	5	3	1	1	1	0	0
67	TikTok	Self-media	139	33	330	87	Mixed feeding	91	3	12	2	3	2	5	1	1	0	0	0	0
68	TikTok	Professional individuals	349	92	86	56	Breastfeeding	111	3	13	2	3	3	5	1	1	0	0	0	0
69	TikTok	Self-media	6175	3335	9702	995	Mixed feeding	87	3	15	3	4	3	5	2	1	0	1	0	0
70	TikTok	Professional individuals	5925	1608	18155	1081	Breastfeeding	101	4	16	4	4	3	5	3	1	1	1	0	0
71	TikTok	Self-media	47	15	3	5	Formula feeding	56	2	11	1	3	2	5	1	1	0	0	0	0
72	TikTok	Professional individuals	1941	520	1959	913	Breastfeeding	84	4	16	4	4	3	5	3	1	1	1	0	0
73	TikTok	Professional individuals	23933	8310	60434	6197	Mixed feeding	49	4	18	5	4	4	5	3	1	1	1	0	0
74	TikTok	Self-media	14022	10371	14723	1748	Mixed feeding	65	3	17	4	4	4	5	2	1	0	1	0	0
75	TikTok	Self-media	15293	5937	26080	5652	Formula feeding	66	4	18	5	4	4	5	3	1	1	1	0	0
76	TikTok	Professional individuals	2102	662	2237	725	Breastfeeding	55	4	16	4	4	3	5	3	1	1	1	0	0
77	TikTok	Self-media	57	28	182	6	Mixed feeding	29	4	15	3	4	3	5	3	1	1	1	0	0
78	TikTok	Self-media	52	22	123	104	Formula feeding	39	3	12	2	3	2	5	1	1	0	0	0	0
79	TikTok	Self-media	44018	1735	13011	11368	Formula feeding	280	4	19	5	5	4	5	3	1	1	1	0	0
80	TikTok	Professional individuals	51	12	22	73	Mixed feeding	24	3	12	2	3	2	5	1	1	0	0	0	0
81	TikTok	Professional individuals	2030	617	2250	892	Breastfeeding	41	4	16	4	4	3	5	3	1	1	1	0	0
82	TikTok	Professional individuals	16103	4559	30116	5199	Mixed feeding	120	4	18	5	4	4	5	3	1	1	1	0	0
83	TikTok	Professional individuals	1625	443	2310	284	Breastfeeding	110	3	14	3	4	3	4	2	1	0	1	0	0
84	TikTok	Professional individuals	2990	712	6088	884	Mixed feeding	88	3	15	3	4	3	5	2	1	0	1	0	0

## Sheet: bilibili
Supplementary table S1 The basic information and ratings of all videos
No.	Source	Type of certifed uploaders	Likes	Collections	Shared	Comments	Feeding recommendations	Video duration（s）	GQSscore	VIQIscore	VIQIscore1	VIQIscore2	VIQIscore3	VIQIscore4	mDISCERNscore	mDISCERN1	mDISCERN2	mDISCERN3	mDISCERN4	mDISCERN5
1	bilibili	Ofcial media	129	70	47	659	Breastfeeding	690	5	16	3	5	3	5	3	1	0	1	0	1
2	bilibili	Self-media	41	19	37	8	Formula feeding	245	3	9	2	3	0	4	2	1	0	0	0	1
3	bilibili	Self-media	5091	1339	1084	791	Breastfeeding	284	4	17	4	5	4	4	4	1	1	1	1	0
4	bilibili	Self-media	55	17	18	869	Formula feeding	255	2	7	2	2	0	3	1	1	0	0	0	0
5	bilibili	Professional individuals	1002	1418	1492	428	Mixed feeding	251	4	14	4	4	3	3	3	1	1	1	0	0
6	bilibili	Self-media	21	14	3	8	Mixed feeding	581	3	11	2	3	2	4	3	1	0	1	1	0
7	bilibili	Self-media	803	294	110	381	Mixed feeding	388	3	12	3	3	3	3	1	1	0	0	0	0
8	bilibili	Professional individuals	49	26	45	299	Formula feeding	112	4	8	2	2	2	2	2	1	0	1	0	0
9	bilibili	Self-media	1	1	0	118	Formula feeding	137	2	5	1	1	1	2	0	0	0	0	0	0
10	bilibili	Professional individuals	521	146	241	442	Breastfeeding	81	4	12	3	3	3	3	2	1	0	1	0	0
11	bilibili	Professional individuals	237	138	158	562	Mixed feeding	140	3	9	3	2	2	2	1	1	0	0	0	0
12	bilibili	Self-media	422	157	275	101	Breastfeeding	266	4	12	3	3	3	3	2	1	0	1	0	0
13	bilibili	Self-media	130	87	115	42	Breastfeeding	379	4	12	3	3	3	3	2	1	0	1	0	0
14	bilibili	Self-media	7	7	9	9	Formula feeding	474	2	5	1	1	1	2	0	0	0	0	0	0
15	bilibili	Self-media	1315	576	556	52	Formula feeding	118	3	16	4	4	4	4	2	1	0	1	0	0
16	bilibili	Professional individuals	57	35	52	700	Mixed feeding	77	3	8	2	2	2	2	1	1	0	0	0	0
17	bilibili	Self-media	0	0	0	10	Mixed feeding	153	2	5	1	1	1	2	0	0	0	0	0	0
18	bilibili	Self-media	5	1	0	79	Mixed feeding	329	3	9	1	2	2	2	1	1	0	0	0	0
19	bilibili	Professional individuals	2.0万	3291	2297	79	Mixed feeding	772	4	20	5	5	5	5	3	1	1	1	0	0
20	bilibili	Professional individuals	313	583	1292	175	Breastfeeding	1554	5	15	3	4	4	4	4	1	1	1	1	0
21	bilibili	Professional individuals	313	583	1292	175	Breastfeeding	1554	5	15	3	4	4	4	4	1	1	1	1	0
22	bilibili	Professional individuals	2.0万	3291	2297	175	Mixed feeding	772	4	14	5	3	3	3	2	1	0	1	0	0
23	bilibili	Self-media	2784	377	304	459	Breastfeeding	32	4	13	4	3	3	3	3	1	1	1	0	0
24	bilibili	Self-media	4	0	2	121	Formula feeding	203	3	10	1	3	3	3	1	1	0	0	0	0
25	bilibili	Self-media	5180	1135	268	121	Breastfeeding	436	4	10	4	2	2	2	2	1	0	1	0	0
26	bilibili	Ofcial media	37	32	64	176	Breastfeeding	152	4	11	2	3	3	3	2	1	0	1	0	0
27	bilibili	Self-media	21	14	3	8	Breastfeeding	581	5	11	2	4	4	4	4	1	1	1	1	0
28	bilibili	Professional individuals	14	31	11	42	Formula feeding	135	3	8	2	2	2	2	1	1	0	0	0	0
29	bilibili	Professional individuals	25	41	68	328	Breastfeeding	233	4	11	2	3	3	3	2	1	0	1	0	0
30	bilibili	Ofcial media	1	2	3	159	Breastfeeding	108	3	7	1	2	2	2	1	1	0	0	0	0
31	bilibili	Professional individuals	75	55	28	700	Breastfeeding	183	4	11	2	3	3	3	2	1	0	1	0	0
32	bilibili	Self-media	17	17	2	29	Mixed feeding	77	4	11	2	3	3	3	2	1	0	1	0	0
33	bilibili	Self-media	0	2	0	280	Breastfeeding	100	3	7	1	2	2	2	1	1	0	0	0	0
34	bilibili	Professional individuals	5074	2358	811	280	Breastfeeding	839	4	13	4	3	3	3	3	1	1	1	0	0
35	bilibili	Professional individuals	409	1052	596	472	Breastfeeding	206	4	12	3	3	3	3	3	1	1	1	0	0
36	bilibili	Self-media	145	109	122	79	Breastfeeding	604	4	12	3	3	3	3	3	1	1	1	0	0
37	bilibili	Professional individuals	86	104	69	403	Mixed feeding	38	4	8	2	2	2	2	2	1	0	1	0	0
38	bilibili	Professional individuals	80	269	55	164	Breastfeeding	219	4	8	2	2	2	2	3	1	1	1	0	0
39	bilibili	Self-media	3	5	0	444	Formula feeding	22	2	5	1	1	1	2	0	0	0	0	0	0
40	bilibili	Self-media	1315	576	556	52	Formula feeding	118	3	16	4	4	4	4	2	1	0	1	0	0
41	bilibili	Self-media	116	86	3	157	Formula feeding	567	3	9	3	2	2	2	1	1	0	0	0	0
42	bilibili	Ofcial media	0	4	6	11	Breastfeeding	264	5	5	1	1	1	2	4	1	1	1	1	0
43	bilibili	Self-media	49	27	38	11	Mixed feeding	243	4	11	2	3	3	3	2	1	0	1	0	0
44	bilibili	Self-media	49	71	2	888	Formula feeding	252	2	8	2	2	2	2	0	0	0	0	0	0
45	bilibili	Self-media	3	2	0	39	Mixed feeding	157	3	5	1	1	1	2	1	1	0	0	0	0
46	bilibili	Self-media	25	41	68	328	Formula feeding	233	4	8	2	2	2	2	2	1	0	1	0	0
47	bilibili	Self-media	5	1	0	79	Mixed feeding	329	3	10	1	3	3	3	1	1	0	0	0	0
48	bilibili	Self-media	439	774	663	412	Breastfeeding	176	4	12	3	3	3	3	3	1	1	1	0	0
49	bilibili	Self-media	287	89	102	459	Formula feeding	64	3	9	3	2	2	2	1	1	0	0	0	0
50	bilibili	Self-media	90	22	17	459	Formula feeding	89	4	8	2	2	2	2	2	1	0	1	0	0
51	bilibili	Self-media	254	235	59	55	Mixed feeding	197	4	12	3	3	3	3	2	1	0	1	0	0
52	bilibili	Self-media	21	14	3	8	Breastfeeding	581	4	12	2	3	3	3	2	1	0	1	0	0
53	bilibili	Professional individuals	6	12	6	79	Mixed feeding	970	4	10	1	3	3	3	2	1	0	1	0	0
54	bilibili	Professional individuals	361	249	416	700	Breastfeeding	110	3	9	3	2	2	2	1	1	0	0	0	0
55	bilibili	Professional individuals	585	440	704	825	Breastfeeding	58	4	12	3	3	3	3	2	1	0	1	0	0
56	bilibili	Professional individuals	223	179	58	42	Breastfeeding	99	4	9	3	2	2	2	3	1	1	1	0	0
57	bilibili	Self-media	234	109	6	423	Formula feeding	157	3	9	3	2	2	2	1	1	0	0	0	0
58	bilibili	Self-media	0	0	0	391	Mixed feeding	142	2	5	1	1	1	2	0	0	0	0	0	0
59	bilibili	Professional individuals	2	14	7	63	Breastfeeding	548	5	13	1	4	4	4	4	1	1	1	1	0
60	bilibili	Professional individuals	17	17	2	34	Breastfeeding	77	3	6	2	1	1	2	1	1	0	0	0	0
61	bilibili	Ofcial media	1	2	3	159	Breastfeeding	108	5	13	1	4	4	4	4	1	1	1	1	0
62	bilibili	Self-media	74	54	28	175	Breastfeeding	536	3	6	2	1	1	2	1	1	0	0	0	0
63	bilibili	Self-media	2536	55	0	466	Breastfeeding	283	4	13	4	3	3	3	1	1	0	0	0	0
64	bilibili	Self-media	7214	755	497	466	Breastfeeding	709	5	16	4	4	4	4	3	1	1	1	0	0
65	bilibili	Professional individuals	179	267	154	700	Breastfeeding	67	3	9	3	2	2	2	0	0	0	0	0	0
66	bilibili	Ofcial media	7877	3430	2908	26	Mixed feeding	62	4	13	4	3	3	3	2	1	0	1	0	0
67	bilibili	Self-media	10	27	10	28	Breastfeeding	158	4	10	1	3	3	3	1	1	0	0	0	0
68	bilibili	Self-media	4	9	11	201	Breastfeeding	263	3	7	1	2	2	2	0	0	0	0	0	0
69	bilibili	Self-media	1961	1709	491	201	Breastfeeding	1035	4	13	4	3	3	3	1	1	0	0	0	0
70	bilibili	Professional individuals	22	44	46	520	Mixed feeding	241	3	8	2	2	2	2	1	1	0	0	0	0
71	bilibili	Professional individuals	0	10	5	467	Breastfeeding	249	4	10	1	3	3	3	3	1	1	1	0	0
72	bilibili	Professional individuals	87	34	87	850	Mixed feeding	41	3	8	2	2	2	2	0	0	0	0	0	0
73	bilibili	Self-media	90	22	17	850	Mixed feeding	89	4	11	2	3	3	3	2	1	0	1	0	0
74	bilibili	Self-media	161	76	3	159	Mixed feeding	135	4	12	3	3	3	3	2	1	0	1	0	0
75	bilibili	Self-media	396	391	319	472	Mixed feeding	216	4	12	3	3	3	3	1	1	0	0	0	0
76	bilibili	Self-media	291	150	99	6	Formula feeding	185	2	7	3	1	1	2	2	1	0	0	0	1
77	bilibili	Self-media	2.1万	8234	7831	885	Mixed feeding	473	4	18	5	4	5	4	4	1	1	1	0	1
78	bilibili	Professional individuals	63	39	47	520	Breastfeeding	67	3	10	2	3	2	3	3	1	1	1	0	0
79	bilibili	Professional individuals	132	61	81	700	Breastfeeding	138	4	14	3	4	3	4	2	1	0	1	0	0
80	bilibili	Professional individuals	45	32	52	78	Mixed feeding	28	4	14	2	5	3	4	2	1	0	1	0	0
81	bilibili	Professional individuals	336	192	340	700	Breastfeeding	90	4	15	3	4	4	4	2	1	0	1	0	0
82	bilibili	Self-media	2357	2124	419	0	Breastfeeding	102	3	13	4	3	3	3	1	1	0	0	0	0
83	bilibili	Self-media	161	76	3	159	Mixed feeding	135	4	15	3	4	4	4	2	1	0	1	0	0

## Sheet: YouTube
Supplementary table S1 The basic information and ratings of all videos
No.	Source	Type of certifed uploaders	Likes	Collections	Shared	Comments	Feeding recommendations	Video duration（s）	GQSscore	VIQIscore	VIQIscore1	VIQIscore2	VIQIscore3	VIQIscore4	mDISCERNscore	mDISCERN1	mDISCERN2	mDISCERN3	mDISCERN4	mDISCERN5
1	YouTube	Self-media	0	N/A	N/A	0	Breastfeeding	138	3	10	1	3	3	4	3	1	1	1	0	0
2	YouTube	Self-media	2	N/A	N/A	0	Formula feeding	29	2	9	1	3	2	3	3	1	1	0	1	0
3	YouTube	Self-media	0	N/A	N/A	0	Mixed feeding	453	3	6	1	2	1	2	3	0	1	1	0	1
4	YouTube	Ofcial media	290	N/A	N/A	23	Breastfeeding	447	4	14	3	4	4	3	4	1	1	1	1	0
5	YouTube	Ofcial media	2	N/A	N/A	1	Mixed feeding	54	3	9	1	3	2	3	3	1	1	1	0	0
6	YouTube	Ofcial media	0	N/A	N/A	0	Breastfeeding	372	2	7	1	2	2	2	2	0	0	1	1	0
7	YouTube	Self-media	35	N/A	N/A	6	Breastfeeding	2646	3	10	2	2	3	3	3	0	1	1	0	1
8	YouTube	Self-media	22	N/A	N/A	2	Breastfeeding	707	4	13	2	3	4	4	3	0	1	1	1	0
9	YouTube	Ofcial media	2	N/A	N/A	2	Mixed feeding	185	3	10	1	3	3	3	4	1	1	1	1	0
10	YouTube	Professional individuals	843	N/A	N/A	70	Formula feeding	8	2	8	3	2	1	2	2	1	0	0	1	0
11	YouTube	Ofcial media	0	N/A	N/A	0	Mixed feeding	6	1	4	1	1	1	1	1	1	0	0	0	0
12	YouTube	Self-media	303401	N/A	N/A	6273	Formula feeding	11	1	8	5	1	1	1	1	1	0	0	0	0
13	YouTube	Self-media	7	N/A	N/A	1	Mixed feeding	1070	3	7	1	2	2	2	3	0	1	1	0	1
14	YouTube	Self-media	143	N/A	N/A	0	Breastfeeding	27	3	9	2	3	2	2	3	1	1	0	1	0
15	YouTube	Self-media	0	N/A	N/A	0	Mixed feeding	71	2	6	1	2	1	2	3	1	1	0	0	1
16	YouTube	Self-media	3295	N/A	N/A	124	Breastfeeding	82	2	10	4	2	2	2	2	1	1	0	0	0
17	YouTube	Self-media	0	N/A	N/A	1	Breastfeeding	72	1	4	1	1	1	1	2	1	1	0	0	0
18	YouTube	Professional individuals	10	N/A	N/A	0	Mixed feeding	52	3	10	1	3	3	3	3	1	1	0	1	0
19	YouTube	Self-media	10163	N/A	N/A	0	Breastfeeding	282	4	17	5	4	4	4	5	1	1	1	1	1
20	YouTube	Professional individuals	1	N/A	N/A	0	Breastfeeding	117	4	12	1	4	3	4	3	1	1	0	1	0
21	YouTube	Self-media	0	N/A	N/A	0	Mixed feeding	623	3	7	1	3	2	2	3	1	0	1	0	1
22	YouTube	Professional individuals	2	N/A	N/A	0	Mixed feeding	529	4	10	1	3	3	3	4	1	1	1	1	0
23	YouTube	Professional individuals	6	N/A	N/A	0	Breastfeeding	40	3	11	1	3	3	4	3	1	1	1	0	0
24	YouTube	Professional individuals	0	N/A	N/A	0	Breastfeeding	42	2	7	1	2	2	2	2	1	0	1	0	0
25	YouTube	Ofcial media	0	N/A	N/A	0	Breastfeeding	201	4	13	1	4	4	4	4	1	1	1	1	0
26	YouTube	Ofcial media	1079	N/A	N/A	410	Formula feeding	221	2	9	4	2	1	2	1	0	0	0	0	1
27	YouTube	Ofcial media	299	N/A	N/A	133	Mixed feeding	690	2	9	3	2	2	1	2	0	1	0	1	0
28	YouTube	Professional individuals	1165	N/A	N/A	355	Breastfeeding	275	3	14	4	4	3	3	4	1	1	1	1	0
29	YouTube	Ofcial media	7	N/A	N/A	3	Formula feeding	289	3	9	1	3	3	2	3	1	1	1	0	0
30	YouTube	Ofcial media	0	N/A	N/A	0	Breastfeeding	210	3	8	1	2	3	2	2	0	1	0	0	1
31	YouTube	Ofcial media	47	N/A	N/A	0	Formula feeding	39	2	7	2	2	2	1	2	1	0	0	0	1
32	YouTube	Ofcial media	130	N/A	N/A	11	Formula feeding	478	2	8	3	2	2	1	3	0	1	1	0	1
33	YouTube	Ofcial media	14	N/A	N/A	0	Formula feeding	65	3	9	2	1	3	3	3	1	1	0	1	0
34	YouTube	Ofcial media	469	N/A	N/A	2	Formula feeding	163	3	9	3	2	2	2	3	1	1	1	0	0
35	YouTube	Ofcial media	0	N/A	N/A	0	Mixed feeding	40	2	7	1	3	1	2	2	0	1	1	0	0
36	YouTube	Professional individuals	55	N/A	N/A	4	Breastfeeding	45	2	7	2	2	1	2	3	1	1	1	0	0
37	YouTube	Ofcial media	2	N/A	N/A	0	Breastfeeding	272	3	7	1	2	2	2	2	0	1	1	0	0
38	YouTube	Ofcial media	0	N/A	N/A	0	Formula feeding	50	2	4	1	1	1	1	2	0	0	0	1	1
39	YouTube	Ofcial media	791634	N/A	N/A	792	Formula feeding	13	1	8	5	1	1	1	1	0	0	0	0	1
40	YouTube	Self-media	489	N/A	N/A	4	Formula feeding	48	2	6	3	1	1	1	2	0	1	0	1	0
41	YouTube	Ofcial media	4	N/A	N/A	2	Mixed feeding	157	3	8	1	2	3	2	3	1	1	0	1	0
42	YouTube	Ofcial media	0	N/A	N/A	59	Mixed feeding	310	4	9	1	3	3	2	3	1	1	1	0	0
43	YouTube	Ofcial media	60	N/A	N/A	17	Breastfeeding	451	4	11	2	3	3	3	4	1	1	1	1	0
44	YouTube	Self-media	44	N/A	N/A	23	Breastfeeding	157	3	7	2	2	2	1	3	1	1	0	0	1
45	YouTube	Ofcial media	4	N/A	N/A	0	Breastfeeding	141	4	10	1	3	3	3	3	1	1	0	1	0
46	YouTube	Ofcial media	36	N/A	N/A	0	Breastfeeding	86	3	10	2	3	2	3	3	1	1	0	0	1
47	YouTube	Professional individuals	4	N/A	N/A	0	Breastfeeding	232	2	7	1	2	2	2	3	1	1	1	0	0
48	YouTube	Ofcial media	9	N/A	N/A	0	Breastfeeding	102	3	8	1	3	3	2	4	1	1	1	0	1
49	YouTube	Self-media	8	N/A	N/A	0	Breastfeeding	20	1	5	1	1	1	2	1	1	0	0	0	0
50	YouTube	Self-media	1	N/A	N/A	0	Breastfeeding	85	2	6	1	2	1	2	2	1	1	0	0	0
51	YouTube	Self-media	2219	N/A	N/A	65	Breastfeeding	114	2	5	1	1	1	2	2	1	1	0	0	0
52	YouTube	Self-media	6	N/A	N/A	1	Breastfeeding	66	1	4	1	1	1	1	1	0	0	0	0	1
53	YouTube	Self-media	88	N/A	N/A	2	Formula feeding	28	1	5	2	1	1	1	2	1	0	0	0	1
54	YouTube	Self-media	3904	N/A	N/A	316	Breastfeeding	262	3	10	4	2	2	2	4	1	1	0	1	1
55	YouTube	Self-media	641	N/A	N/A	7	Formula feeding	12	1	6	3	1	1	1	1	0	0	0	0	1
56	YouTube	Ofcial media	0	N/A	N/A	0	Mixed feeding	124	4	11	1	3	4	3	4	1	1	1	1	0
57	YouTube	Ofcial media	4	N/A	N/A	0	Breastfeeding	204	3	9	1	3	2	3	3	1	1	1	0	0
58	YouTube	Self-media	37	N/A	N/A	9	Formula feeding	1276	2	7	2	2	2	1	2	1	1	0	0	0
59	YouTube	Ofcial media	0	N/A	N/A	0	Formula feeding	37	2	8	1	2	2	3	2	1	0	0	0	1
60	YouTube	Self-media	1	N/A	N/A	5	Mixed feeding	394	3	7	1	2	2	2	3	1	0	0	1	1
61	YouTube	Ofcial media	3	N/A	N/A	0	Mixed feeding	246	3	7	1	2	2	2	4	1	1	1	0	1
62	YouTube	Ofcial media	0	N/A	N/A	0	Mixed feeding	237	4	13	1	4	4	4	4	1	1	1	1	0
63	YouTube	Self-media	4	N/A	N/A	3	Breastfeeding	407	3	9	1	3	3	2	2	0	1	0	0	1
64	YouTube	Ofcial media	10	N/A	N/A	0	Mixed feeding	16	1	4	1	1	1	1	1	0	0	0	0	1
65	YouTube	Ofcial media	2	N/A	N/A	1	Breastfeeding	272	2	8	1	3	2	2	2	0	1	0	0	1
66	YouTube	Self-media	1663	N/A	N/A	0	Mixed feeding	162	3	10	4	2	2	2	3	1	1	0	0	1
67	YouTube	Self-media	9	N/A	N/A	4	Breastfeeding	1018	3	10	1	3	3	3	3	1	1	0	1	0
68	YouTube	Self-media	138	N/A	N/A	24	Formula feeding	406	3	9	3	2	2	2	3	1	0	0	1	1
69	YouTube	Self-media	0	N/A	N/A	0	Breastfeeding	32	2	7	1	2	2	2	2	1	0	0	0	1
70	YouTube	Self-media	8	N/A	N/A	0	Breastfeeding	901	3	8	1	3	2	2	3	1	1	0	0	1
71	YouTube	Self-media	1	N/A	N/A	0	Breastfeeding	32	1	4	1	1	1	1	1	0	0	0	0	1
72	YouTube	Self-media	195	N/A	N/A	57	Formula feeding	1052	3	9	3	2	2	1	3	0	1	1	0	1
73	YouTube	Ofcial media	81	N/A	N/A	0	Mixed feeding	242	3	11	2	3	3	3	4	1	1	1	1	0
74	YouTube	Ofcial media	1	N/A	N/A	0	Mixed feeding	215	4	11	1	3	4	3	4	1	1	1	0	1
75	YouTube	Professional individuals	15	N/A	N/A	13	Breastfeeding	481	3	12	2	3	3	4	4	1	1	0	1	1
76	YouTube	Professional individuals	9	N/A	N/A	4	Mixed feeding	314	3	9	1	3	2	3	3	1	1	1	0	0
77	YouTube	Professional individuals	2	N/A	N/A	0	Breastfeeding	417	3	9	1	3	3	2	3	1	1	0	0	1
78	YouTube	Professional individuals	429	N/A	N/A	36	Formula feeding	945	3	10	3	3	2	2	3	0	1	1	1	0
79	YouTube	Professional individuals	520	N/A	N/A	14	Formula feeding	58	2	8	3	2	1	2	2	0	0	1	0	1
80	YouTube	Professional individuals	1	N/A	N/A	0	Mixed feeding	213	2	8	1	3	2	2	3	1	1	0	1	0
81	YouTube	Professional individuals	91	N/A	N/A	1	Breastfeeding	61	2	10	2	3	2	3	2	1	1	0	0	0
82	YouTube	Professional individuals	9	N/A	N/A	0	Breastfeeding	119	3	11	2	3	3	3	4	1	1	1	1	0
83	YouTube	Professional individuals	12	N/A	N/A	8	Mixed feeding	695	3	9	2	3	2	2	3	0	1	1	1	0
84	YouTube	Professional individuals	1030	N/A	N/A	211	Formula feeding	154	3	10	4	3	2	1	4	1	1	0	1	1
85	YouTube	Professional individuals	0	N/A	N/A	0	Breastfeeding	530	3	8	1	3	3	1	3	1	1	0	0	1
86	YouTube	Professional individuals	37	N/A	N/A	1	Breastfeeding	56	3	10	2	3	2	3	3	1	1	0	1	0
87	YouTube	Professional individuals	567	N/A	N/A	3	Formula feeding	28	2	6	3	1	1	1	2	1	0	0	0	1
88	YouTube	Professional individuals	1	N/A	N/A	0	Mixed feeding	61	2	6	1	2	2	1	2	1	0	0	0	1
